# Supplementary material for: A Systematic Review of Mathematical Models of Dengue Transmission and Vector Control: 2010–2020
Source: MDPI journal article supplement (doi:10.3390/v15010254), 2023-01-16
Supplement: s1 [file s1]

## **SEARCH STRATEGIES FOR SYSTEMATIC REVIEW**

### **A systematic review of dengue transmission models: vector control approach.**

#### **MEDLINE: (1069 articles)**

1. \*arbovirus infections/ or exp dengue
2. \*flavivirus/ or \*dengue virus/
3. 1 or 2
4. exp Models, Biological
5. exp disease outbreaks/ or exp disease transmission, infectious
6. exp \*Disease Models, Animal/
7. 4 or 5 or 6
8. exp Culicidae/
9. exp Disease Vectors/
10. exp Mosquito Nets/
11. exp Insect Control/
12. \*arthropods/ or insecta/
13. 8 or 9 or 10 or 11 or 12
14. exp communicable disease control/ or infection control/
15. exp population dynamics/ or population control/
16. \*Infection Control/
17. \*Disease Eradication/
18. 14 or 15 or 16 or 17
19. 13 and 18
20. 3 and 7
21. 19 and 20

exp -> a search term was "exploded" in the MeSH (Medical Subject Headings) from MEDLINE vocabulary to also capture all narrower terms associated with the broader concept.

### **WEB OF SCIENCE: (643 articles)**

**TOPIC:** (dengue OR arbovirus\* OR flavivirus\*) AND

**TOPIC:** (transmi\* model\* OR infect\* model\*) AND

**TOPIC:** (vector\* OR mosquito\* OR insect\* OR Aedes OR arthropod\*) AND

**TOPIC:** (control\* strateg\* OR control\* techni\* OR control\* approach\* OR control\* method\*)

**Timespan:** All years.

**Indexes:** SCI-EXPANDED, SSCI, A&HCI, CPCI-S, CPCI-SSH, ESCI, CCR-EXPANDED, IC

### **SCOPUS: (446 articles)**

( ( TITLE-ABS-KEY ( dengue OR arbovirus\* OR flavivirus\* ) ) AND ( TITLE-ABS-KEY ( transmi\* AND model\* OR infect\* AND model\* ) ) ) AND ( ( TITLE-ABS-KEY ( vector\* OR mosquito\* OR insect\* OR aedes OR arthropod\* ) ) AND ( TITLE-ABS-KEY ( control\* AND strateg\* OR control\* AND techni\* OR control\* AND approach\* OR control\* AND method\* ) ) )
